# Supplementary material for: Cytosine base editor 4 but not adenine base editor generates off-target mutations in mouse embryos
Source: PubMed Central journal article supplement (PMC6952419; doi:10.1038/s42003-019-0745-3), 2020-01-09
Supplement: 42003_2019_745_MOESM2_ESM.pdf [file 42003_2019_745_MOESM2_ESM.pdf]

## **Description of additional supplementary materials**

**Supplementary Data 1.** Raw read counts of WGS data

**Supplementary Data 2.** SNVs identified in each sample and de novo SNPs for the progeny

**Supplementary Data 3.** Indels identified in each sample and de novo indels for the progeny

**Supplementary Data 4.** Location of the four predicted off-target sites overlapping with de novo SNVs. The samples harboring the same SNV are grouped into overlapping groups.

**Supplementary Data 5.** Characterization of de novo indels
